# Supplementary material for: Fabrication of a silica sphere with fluorescent and MR contrasting GdPO4 nanoparticles from layered gadolinium hydroxide
Source: Royal Society of Chemistry journal article supplement (doi:10.1039/b927570c), 2010-01-01
Supplement: b927570c.pdf [file b927570c.pdf]

## Supporting Information

### **“Fabrication of a Silica Sphere with Fluorescent and MR Contrasting GdPO<sub>4</sub> Nanoparticles from Layered Gadolinium Hydroxide”**

Young-su Yoon,<sup>†</sup> Byung-Il Lee,<sup>†</sup> Kyung Sig Lee,<sup>†</sup> Hyejung Heo,<sup>‡</sup> Jung Hee Lee,<sup>‡,\*</sup> Song-Ho Byeon,<sup>†,\*</sup> and In Su Lee,<sup>†,\*</sup>

<sup>†</sup>*Department of Applied Chemistry, College of Applied Science, Kyung Hee University, Gyeonggi-do 449-701, Korea, and* <sup>‡</sup>*Department of Radiology, Samsung Medical Center, Sungkyunkwan University School of Medicine, Seoul 135-710, Korea.*

e-mail: [hijunghee@skku.edu](mailto:hijunghee@skku.edu) (J. H. L.), [shbyun@khu.ac.kr](mailto:shbyun@khu.ac.kr) (S. H. B.), [insulee97@khu.ac.kr](mailto:insulee97@khu.ac.kr) (I. S. L.)

*Chem. Commun.*

## Synthesis of silica spheres having GdPO<sub>4</sub>:Eu nanoparticles at the surface.

**General consideration.** Any reagent including GdCl<sub>3</sub>•6H<sub>2</sub>O (Aldrich), EuCl<sub>3</sub>•6H<sub>2</sub>O (Aldrich), tetraethylorthosilicate (TEOS, Acros), NH<sub>4</sub>OH solution (0.28~0.3 M, Samchun), sodium 3-(trihydroxysilyl)propylmethylphosphonate (TSPMP, Aldrich), 2-[methoxy(polyethylenoxy)propyl]trimethoxysilane (MPEOPS, Gelest) was used as purchased without any purification. Analyses of transmission electron microscopy (TEM) and energy dispersive X-ray spectroscopy (EDX) were conducted with JEOL JEM-2010. Scanning electron microscopy (SEM) was carried out with LEO SUPRA 55 (Carl Zeiss, Germany). X-ray diffraction patterns were obtained by using a rotating anode installed X-Ray Diffractometer (18kW) (Mac Science, Japan). UV absorption and fluorescence were observed by using V670 UV-Visible-NIR spectrophotometer (JASCO) and FP-6600 spectrofluorometer (JASCO), respectively.

**Synthesis of LGdH:Eu and SiO<sub>2</sub>-P.** A colloid of delaminated layers of 10% Eu<sup>3+</sup> doped LGdH (LGdH:Eu), [Gd<sub>1.8</sub>Eu<sub>0.2</sub>(OH)<sub>5</sub>(H<sub>2</sub>O)<sub>x</sub>]Cl, and silica spheres with a surface modified anionically with methylphosphonate groups (**SiO<sub>2</sub>-P**) were prepared by a modification of a previously reported procedure.<sup>S1,S2</sup> For the synthesis of LGdH:Eu, a KOH solution (0.1 M, 100 ml) was slowly added to the aqueous solution (100 ml) containing GdCl<sub>3</sub>•6H<sub>2</sub>O (1.67g, 6.34 mmol) and EuCl<sub>3</sub>•6H<sub>2</sub>O (0.182g, 0.634mmol) and reacted for 15 min at 60 °C. After cooling the reaction suspension, the resulting LGdH:Eu was isolated by the centrifugation and purified by three times washes with water. For the preparation of **SiO<sub>2</sub>-P**, TEOS (6.32 ml, 28.5mmol) was added to a water/EtOH mixture solution (63.5 ml) of NH<sub>4</sub>OH and stirred for 30 min at room temperature. Then an aqueous solution of sodium 3-(trihydroxysilyl)propylmethylphosphonate (TSPMP, 2ml, 10.5 mmol) was injected to the reaction solution and stirred for additional 2 hr. The resulting silica spheres, **SiO<sub>2</sub>-P**, with methylphosphonate groups at the surface were collected by centrifugation. The collected **SiO<sub>2</sub>-P** spheres were redispersed in EtOH and recovered by the centrifugation. The dispersion

of **SiO<sub>2</sub>-P** into EtOH suspension and the centrifugation was repeated three times for the purification.

**Synthesis of SiO<sub>2</sub>-L and SiO<sub>2</sub>-A.** In order to deposit the LGdH:Eu layers on the **SiO<sub>2</sub>-P** surface, the **SiO<sub>2</sub>-P** spheres (100 mg) and the LGdH:Eu (20 mg) were mixed in a formamide solution (20 ml) and sonicated for 20 min. The resulting spheres, **SiO<sub>2</sub>-L**, were collected by the centrifugation with a low speed spin (3000 rpm). The collected spheres of **SiO<sub>2</sub>-L** were redispersed in water and recovered by the centrifugation. The isolated solid of **SiO<sub>2</sub>-L** were completed dried *in vacuo* at room temperature. The powder of **SiO<sub>2</sub>-L** was heated up with 5 °C/min heating rate in a furnace and annealed in air condition for 4 hr at 400 °C, 500 °C, 600 °C, 700 °C, and 800 °C generating the nanospheres of **SiO<sub>2</sub>-A**.

**Synthesis of SiO<sub>2</sub>-PEG.** The spheres of **SiO<sub>2</sub>-A-700** (30mg) and 2-[methoxy(polyethylenoxy)propyl]trimethoxysilane (MPEOPS) (1 ml) were mixed in an ethanol suspension. Then small amount of NH<sub>4</sub>OH solution was added to the suspension to initiate the reaction and stirred for 12 hr. The resulting PEG-modified silica sphere, **SiO<sub>2</sub>-PEG**, hybrid were recovered by the centrifugation and washed with water for several times.

### Measuring MRI relaxation properties

T<sub>1</sub> and T<sub>2</sub> relaxation times of the aqueous suspension of the **SiO<sub>2</sub>-PEG** that were prepared in test tubes with varying concentrations were measured on a 3.0 T clinical MRI scanner (Philips, Achieva ver. 1.2, Philips Medical Systems, Best, The Netherlands) equipped with 80 mT/m gradient amplitude and 200 ms/m slew rate. A Look-Locker sequence (TR/TE = 10/1 ms and flip angle = 5°) was used to measure T<sub>1</sub> by acquiring 17 gradient echo images at different inversion delay times using minimum inversion time of 87 ms with a phase interval of 264 ms with in-plane image resolution = 625 × 625 mm<sup>2</sup> and slice thickness = 500 mm. The images were fitted into a 3-parameter function to calculate T<sub>1</sub> values using Matlab program. T<sub>2</sub> measurements were performed by using 10 different echo times in a multislice turbo spin

echo sequence (TR/TE = 5000/20, 40, 60, 80, 100, 120, 140, 160, 180, 200 ms, in-plane resolution =  $200 \times 200 \text{ mm}^2$ , slice thickness = 500 mm). The images were fitted into Levenberg-Margardt method to calculate  $T_2$  values using Matlab program. We calculated the specific relaxivities ( $r_1$  and  $r_2$ ) of the nanoparticles from the plot of  $T_1^{-1}$  and  $T_2^{-1}$  vs concentration of contrast agent. The signal intensities of each ROIs (regions of interest) in the  $T_1$  map (60 – 80 pixels) and the  $T_2$  map (200 – 300 pixels) were measured for each concentration, which were then used for  $r_1$  and  $r_2$  calculations, respectively. We derived specific relaxivities based on the molar concentration of gadolinium atom measured by ICP-AES.

#### **Investigation of cell labeling with the SiO<sub>2</sub>-PEG.**

**Cell culture.** A human breast cancer cell line, MDA-MB-435s cells were maintained in growth media (L-15 with L-glutamin, 1% antibiotic-antimycotic, 10% fetal bovine serum) at 37 °C in a humidified atmosphere of 0 % of CO<sub>2</sub>. Cells were regularly passaged and reseeded 24 h before cellular uptake experiments.

**Confocal laser scanning microscopy (CLSM).** MDA-MB-435s cells were plated in chamber slides 24 h before cellular uptake, at a density of  $5 \times 10^3$  cells per well. The cells were cultured with the spheres of **SiO<sub>2</sub>-PEG** for 2 h at 37 °C. The concentration of gadolinium atoms was 1  $\mu\text{M}$ . Then the cells were washed with cold PBS three times. The cells were fixed in 4 % paraformaldehyde solution, after cell washed with cold PBS three times. The slides were covered with a DAPI mounting medium. The cells were imaged with the 544 nm excitation source by using Bio-rad Radiance 2100 Confocal Microscope System.

**In vitro MRI of cells.** MDA-MB-435s cells incubated with the spheres of **SiO<sub>2</sub>-PEG** at 50  $\mu\text{g/ml}$ , 250  $\mu\text{g/ml}$ , 1 mg/ml of Gd concentrations were centrifuged, and the resulting cell pellets were mixed with 1 % agarose solution. The mixture was transferred into Eppendorf-tube for MRI.  $T_1$ - and  $T_2$ -weighted MRI of the cells mixed with agarose were performed with

a 3.0 T whole body MRI system (Philips, Achieva ver. 1.2, Philips Medical Systems, Best, The Netherlands) equipped with 80 mT/m gradient amplitude and 200 ms/m slew rate.

**Cytotoxicity evaluation of the SiO<sub>2</sub>-PEG.** Cell viability was determined in MCF-7 cells maintained in grow media (RPMI 1640 and Leibovitz's L-15 media with L-glutamin, 1% antibiotic-antimycotic, 10% fetal bovine serum) at 37 °C in a humidified atmosphere of 5 % of CO<sub>2</sub>. Cytotoxicity of the spheres of **SiO<sub>2</sub>-PEG** was evaluated by measuring the inhibition of cell growth using the MTT assay.<sup>S3</sup> Briefly, cells were plated at a density of 5×10<sup>3</sup> cells/ml in 96-well plates and treated with the above compounds for 72 h. After treatment, the cells were washed and incubated for an additional 0.5mg of MTT for 3 h. Cell viabilities were presented as the ratio of the number of cells treated to the number of non-treated control cells. Cell viability graphs were plotted as concentration of gadolinium atom.

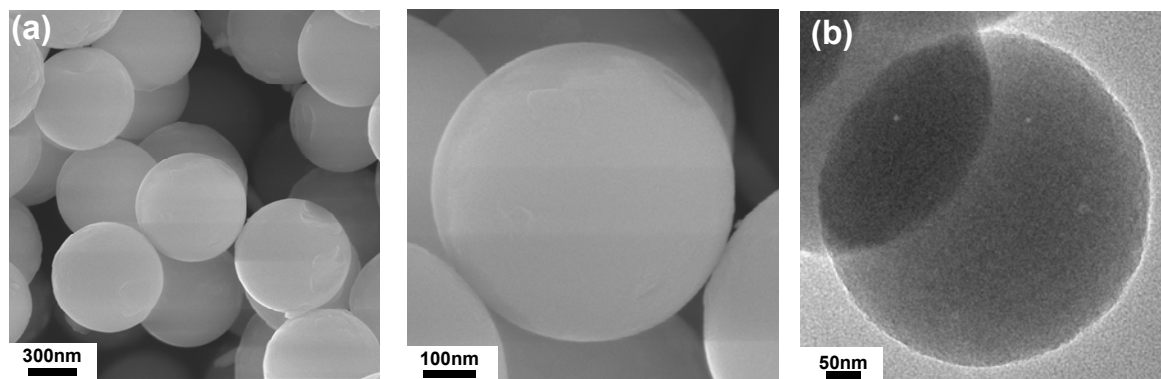

**Figure S1.** (a) SEM and (b) TEM images of the reaction adduct obtained from the control experiment with LGdH:Eu and unmodified SiO<sub>2</sub> spheres.

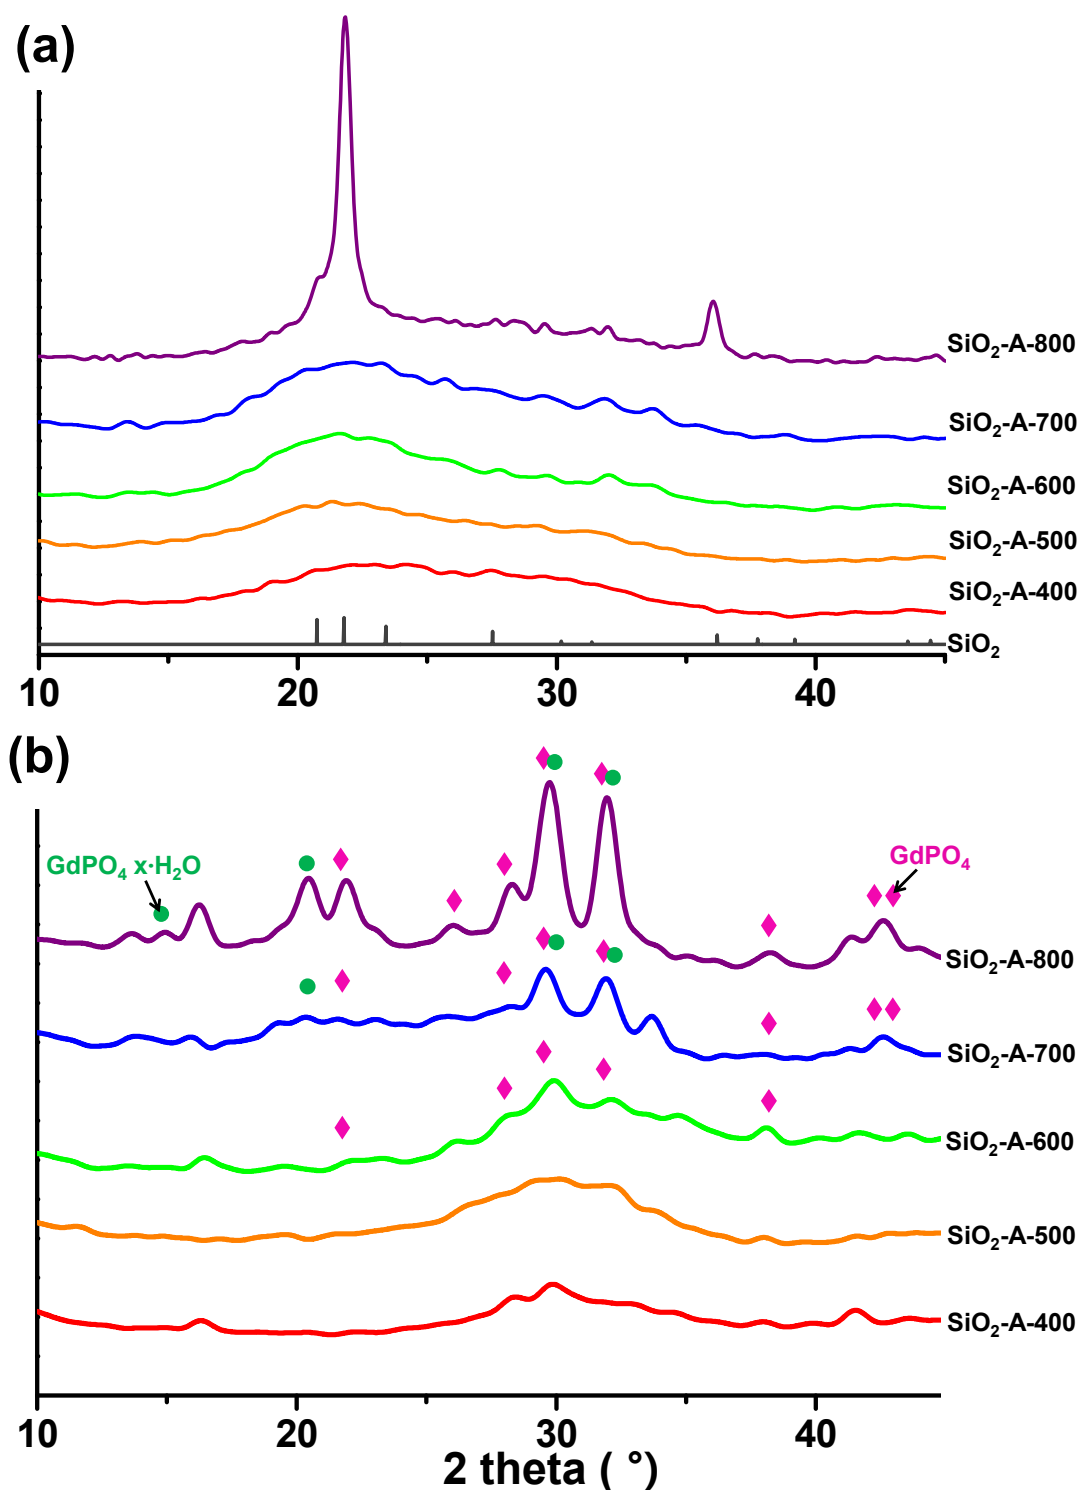

**Figure S2.** XRD patterns of (a) the as-prepared SiO<sub>2</sub>-As and (b) the solids obtained by etching SiO<sub>2</sub>-As with a NaOH solution. The crystalline phases of GdPO<sub>4</sub> and GdPO<sub>4</sub>·xH<sub>2</sub>O were assigned by comparing with JCPDS Cards (No. 84-0920 and 39-0232), respectively. Two XRD peaks positioned at 16 ° and 41 ° were due to the formation of Gd(OH)<sub>3</sub> (JCPDS Card No. 83-2037) during the silica etching process.

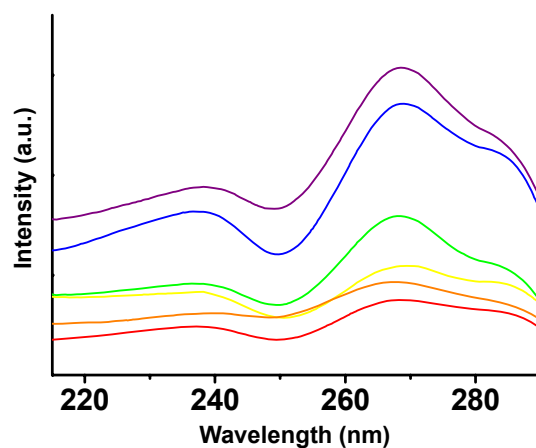

**Figure S3.** Excitation spectra of the powders of  $\text{SiO}_2\text{-L}$  and  $\text{SiO}_2\text{-As}$  for the emission at 615 nm.

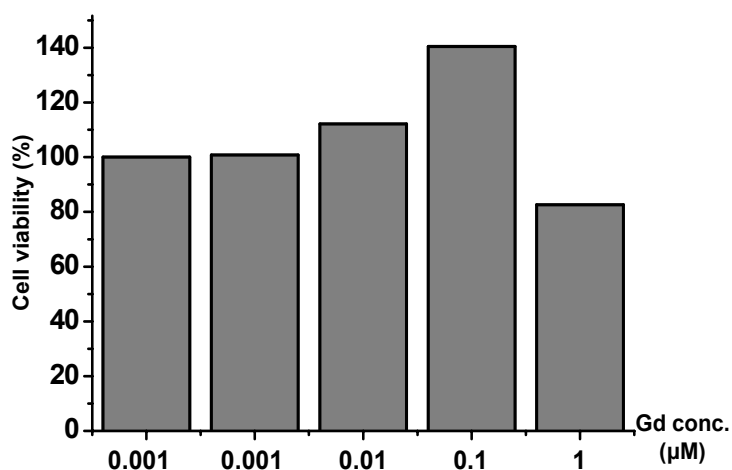

**Figure S4.** The cytotoxicity of  $\text{SiO}_2\text{-PEG}$  to MCF-7 cells as a function of the Gd concentration. The results are presented as the mean of four experiments with standard deviations.



## References for the Supporting Information

[S1] B.-I. Lee, K. S. Lee, J. H. Lee, I. S. Lee and S.-H. Byeon, *Dalton Trans.* 2009, 2490.

[S2] R. P. Bagwe, L. R. Hilliard and W. Tan, *Langmuir* 2006, **22**, 4357.

[S3] (a) T. Mosmann, *J. Immunol. Methods* 1983, **65**, 55. (b) D. Gerlier and N. Thomasset, *J. Immunol. Methods* 1986, **94**, 57.
